# Supplementary material for: Genomics reveals historic and contemporary transmission dynamics of a bacterial disease among wildlife and livestock
Source: PubMed Central journal article supplement (PMC4865865; doi:10.1038/ncomms11448), 2016-05-11
Supplement: ncomms11448-s1.pdf [file ncomms11448-s1.pdf]

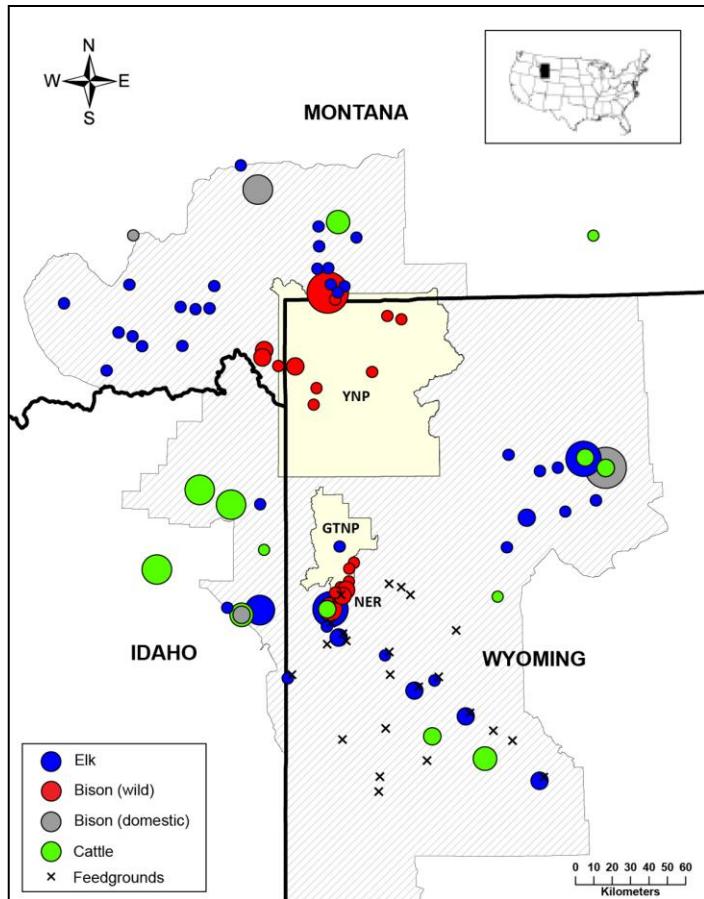

**Supplementary Figure 1.** *Brucella abortus* sampling by host species in the Greater Yellowstone Ecosystem. Sampling by location and host species reported with circles (elk = blue; wild bison = red; domestic bison = gray; cattle = green), with circle size relative to sample size (Range: 1 to 26). The 23 Wyoming elk feedgrounds are indicated (×). Livestock locations represent the last location prior to slaughter. Diagonal line shading represents the area in 2015 where elk populations chronically infected with *Brucella* bacteria could potentially transmit brucellosis to livestock. YNP = Yellowstone National Park; GTNP = Grand Teton National Park; NER = National Elk Refuge.

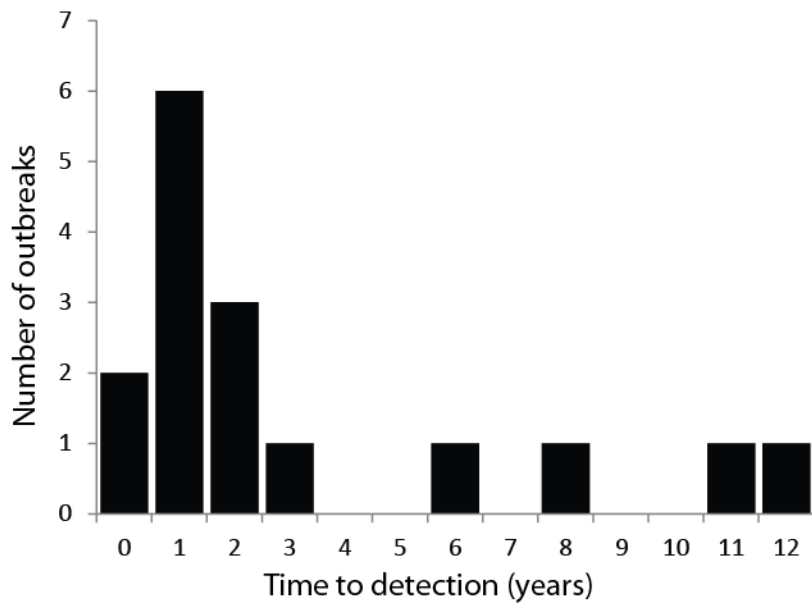

**Supplementary Figure 2.** Frequency distribution of brucellosis detection time within livestock herd outbreaks.

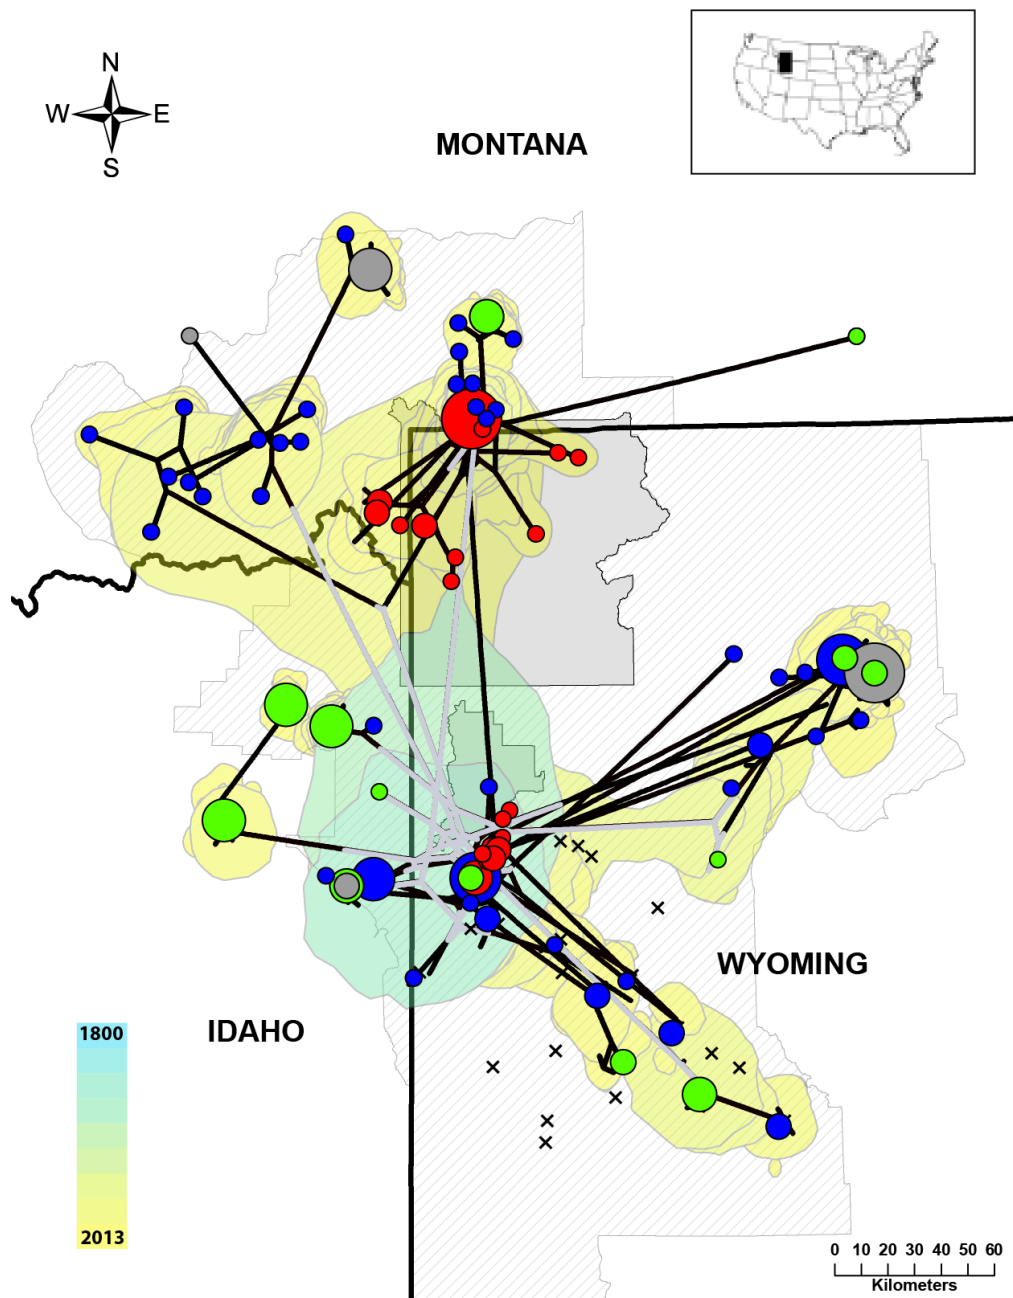

**Supplementary Figure 3. Continuous phylogeographic diffusion model of *B. abortus* spatial spread in the GYE.** This analysis includes all isolates and does not consider the different *Brucella* lineages as possible introductions. Polygons show the 80% highest probability density for the extent of spatial dispersion, with the relative time of dispersal represented by a blue to yellow gradient corresponding to the time period from approximately 1800 to 2013. The *B. abortus* time-measured phylogeny is overlaid on the map with historical (pre-1990) and contemporary (post-1990) dispersal branches represented in gray and black, respectively. Observed brucellosis cases shown at the tips by host species (elk = blue; wild bison = red; domestic bison = gray; cattle = green).

**Supplementary Table 1. Sampling summary of *B. abortus* isolates.**

|                    | <b>Host species</b>     | <b>State or Country*</b> | <b>N</b> | <b>Sampling period</b> |
|--------------------|-------------------------|--------------------------|----------|------------------------|
| <b>Inside GYE</b>  | <i>Elk</i>              | ID                       | 10       | 2001-2005              |
|                    |                         | MT                       | 21       | 2005-2012              |
|                    |                         | WY                       | 54       | 1993-2011              |
|                    | <i>Bison (wild)</i>     | MT                       | 31       | 1985-2013              |
|                    |                         | WY                       | 27       | 2000-2011              |
|                    | <i>Bison (domestic)</i> | ID                       | 3        | 2012-2013              |
|                    |                         | MT                       | 9        | 2010-2013              |
|                    |                         | WY                       | 26       | 2010-2012              |
|                    | <i>Cattle</i>           | ID                       | 29       | 1986-2013              |
|                    |                         | MT                       | 7        | 2007-2011              |
|                    |                         | WY                       | 20       | 1989-2011              |
|                    |                         | <b>TOTAL</b>             |          | <b>237</b>             |
| <b>Outside GYE</b> | <i>Cattle</i>           | FL                       | 2        | 1993                   |
|                    |                         | MO                       | 1        | 1993                   |
|                    |                         | OK                       | 1        | 1990                   |
|                    |                         | GBR                      | 1        | 1965                   |
|                    | <i>Goat</i>             | PRT                      | 1        | 2006                   |
|                    | <i>Human</i>            | USA                      | 1        | 1990                   |
|                    | <i>Unknown</i>          | GBR                      | 1        | 1967                   |
|                    |                         | <b>TOTAL</b>             |          | <b>8</b>               |

\*Abbreviations: ID (Idaho), MT (Montana), WY (Wyoming), FL (Florida), MO (Missouri), OK (Oklahoma), GBR (Great Britain), and PRT (Portugal).

**Supplementary Table 2.** Bayes factor values for MLE path sampling model selection of clock and demographic model combinations. Selected model is highlighted.

| <i><b>Clock Model</b></i> |                                 | <b>Strict</b>   |                |                | <b>Relaxed lognormal</b> |                |                |
|---------------------------|---------------------------------|-----------------|----------------|----------------|--------------------------|----------------|----------------|
|                           | <i><b>Demographic Model</b></i> | <i>Constant</i> | <i>Skyline</i> | <i>Skyride</i> | <i>Constant</i>          | <i>Skyline</i> | <i>Skyride</i> |
| <b>Strict</b>             | <i>Constant</i>                 | ---             | -41.8          | 137.5          | -34.3                    | -75.7          | 19.1           |
|                           | <i>Skyline</i>                  | 41.8            | ---            | 179.3          | 7.5                      | -33.9          | 60.9           |
|                           | <i>Skyride</i>                  | -137.5          | -179.3         | ---            | -171.8                   | -213.2         | -118.4         |
| <b>Relaxed lognormal</b>  | <i>Constant</i>                 | 34.3            | -7.5           | 171.8          | ---                      | -41.4          | 53.4           |
|                           | <i>Skyline</i>                  | 75.7            | 33.9           | 213.2          | 41.4                     | ---            | 94.8           |
|                           | <i>Skyride</i>                  | -19.1           | -60.9          | 118.4          | -53.4                    | -94.8          | ---            |

Stepping-stone sampling (not shown here) produced similar results

**Supplementary Table 3.** Number of fixed polymorphic differences (above diagonal) and shared mutations (below diagonal) between *Brucella* lineages in the Greater Yellowstone Ecosystem.

| <i>Lineage</i> | <b>L1</b> | <b>L2</b> | <b>L3</b> | <b>L4</b> | <b>L5</b> |
|----------------|-----------|-----------|-----------|-----------|-----------|
| <b>L1</b>      | ---       | 186       | 177       | 177       | 177       |
| <b>L2</b>      | 0         | ---       | 85        | 85        | 85        |
| <b>L3</b>      | 0         | 0         | ---       | 26        | 52        |
| <b>L4</b>      | 1         | 0         | 9         | ---       | 52        |
| <b>L5</b>      | 0         | 0         | 7         | 10        | ---       |

**Supplementary Table 4.** The number of fixed differences and shared polymorphisms for each *Brucella* lineage compared with all other isolate sequences in the Greater Yellowstone Ecosystem. The number of sequences (*n*) and polymorphic sites (*P*) per lineage are shown.

| <i>Lineage</i> | <i>n</i> | <i>P</i> | Fixed differences | Shared mutations |
|----------------|----------|----------|-------------------|------------------|
| <b>L1</b>      | 30       | 146      | 139               | 1                |
| <b>L2</b>      | 53       | 135      | 47                | 0                |
| <b>L3</b>      | 19       | 99       | 13                | 10               |
| <b>L4</b>      | 52       | 185      | 13                | 14               |
| <b>L5</b>      | 81       | 293      | 26                | 11               |

**Supplementary Table 5.** Comparison and statistical performance of clock and demographic models.

| <b>Molecular clock model</b> | <b>Demographic model</b> | <b>Root height (95% HPD)*</b> | <b>Clock Rate (95% HPD) †</b> | <b>COV (95% HPD) ‡</b> | <b>Log marginal likelihood</b> |
|------------------------------|--------------------------|-------------------------------|-------------------------------|------------------------|--------------------------------|
| <b>Strict</b>                | <i>Constant</i>          | 256 (216-303)                 | 1.28 (1.08-1.46)              | n/a                    | -4533280                       |
|                              | <i>Skyline</i>           | 258 (215-311)                 | 1.25 (1.06-1.44)              | n/a                    | -4533239                       |
|                              | <i>Skyride</i>           | 163 (139-189)                 | 1.59 (1.36-1.80)              | n/a                    | -4533418                       |
| <b>Relaxed</b>               | <i>Constant</i>          | 271 (171-408)                 | 1.40 (1.11-1.70)              | 0.69 (0.51-0.90)       | -4533246                       |
|                              | <i>Skyline</i>           | 244 (151-375)                 | 1.40 (1.09-1.73)              | 0.63 (0.46-0.84)       | -4533205                       |
|                              | <i>Skyride</i>           | 52 (48-58)                    | 2.40 (2.07-2.77)              | 1.54 (1.15-1.96)       | -4533299                       |

n/a, not applicable

\*Units are in number of years prior to 2013, HPD, highest probability density

†Units are  $10^{-7}$  substitutions per nucleotide per year

‡COV: Coefficient of variation, which is a measure of the variation in evolutionary rate among branches

**Supplementary Table 6.** Estimated median time to brucellosis detection during livestock outbreaks.

| Herd No. | Host    | State | County     | Lineage | Year Detected | MRCA date (95% HPD) | Time to detection (years) | PP   |
|----------|---------|-------|------------|---------|---------------|---------------------|---------------------------|------|
| 1        | Cattle* | WY    | Fremont    | L5      | 1989          | 1988 (1985-1989)    | 1                         | 1.00 |
| 2        | Cattle  | ID    | Fremont    | L5      | 2002          | 1996 (1991-1999)    | 6                         | 1.00 |
| 3        | Cattle  | WY    | Teton      | L1      | 2004          | 2003 (2001-2004)    | 1                         | 0.14 |
| 4        | Cattle  | WY    | Sublette   | L3      | 2004          | 1992 (1986-1997)    | 12                        | 1.00 |
| 5        | Cattle  | ID    | Bonneville | L4      | 2005          | 1997 (1990-2002)    | 8                         | 1.00 |
| 6        | Cattle* | WY    | Sublette   | L1      | 2008          | 2006 (2004-2008)    | 2                         | 0.35 |
| 7        | Cattle† | ID    | Jefferson  | L4      | 2009          | 1998 (1991-2004)    | 11                        | 1.00 |
| 8        | Bison   | MT    | Gallatin   | L5      | 2010          | 2007 (2003-2010)    | 3                         | 1.00 |
| 9        | Cattle  | WY    | Park       | L5      | 2010          | 2010 (2008-2010)    | 0                         | 1.00 |
| 10       | Bison‡  | WY    | Park       | L5      | 2010          | 2009 (2007-2010)    | 1                         | 1.00 |
| 11       | Cattle  | MT    | Park       | L2      | 2011          | 2010 (2008-2011)    | 1                         | 1.00 |
| 12       | Cattle  | WY    | Park       | L5      | 2011          | 2009 (2006-2011)    | 2                         | 1.00 |
| 13       | Cattle  | WY    | Park       | L5      | 2011          | 2011 (2010-2011)    | 0                         | 1.00 |
| 14       | Bison   | ID    | Bonneville | L1      | 2012          | 2011 (2010-2012)    | 1                         | 1.00 |
| 15       | Cattle† | ID    | Fremont    | L4      | 2012          | 2011 (2010-2012)    | 1                         | 1.00 |

MRCA, Most recent common ancestor; 95% HPD, 95% Highest probability density interval; PP, posterior probability

\*Elk isolate nested within livestock cluster

†Genetically-linked cattle outbreaks: 2009 outbreak in Jefferson County, ID ancestral to 2012 outbreak in Fremont County, ID.

‡Single isolate from herd fell outside group, clustering with elk. Possible independent transmission event, and was not included in MRCA date estimate.



**Supplementary Table 7.** Model estimates for host state transitioning between pairs of hosts when considering four host states: elk, wild bison (w), domestic bison (d) and cattle.

| <b>FROM</b>             | <b>TO</b>        | <b>Rate (95% HPD)*</b> | <b># Jumps (95% HPD) †</b> | <b>BF‡</b> |
|-------------------------|------------------|------------------------|----------------------------|------------|
| <b>Elk</b>              | <b>Bison (w)</b> | 0.75 (0.03-1.78)       | 5.02 (1.97-8.31)           | 84         |
|                         | <b>Bison (d)</b> | 0.78 (0.10-1.71)       | 5.22 (4.93-5.80)           | 80978      |
|                         | <b>Cattle</b>    | 1.53 (0.29-3.11)       | 10.66 (8.95-13.44)         | 80978      |
| <b>Bison (wild)</b>     | <b>Elk</b>       | 2.56 (0.58-5.04)       | 12.97 (7.27-20.31)         | 80978      |
|                         | <b>Bison (d)</b> | 0.10 (0.00-2.86)       | 0.00 (0.00-0.05)           | 0          |
|                         | <b>Cattle</b>    | 0.34 (0.00-2.35)       | 0.00 (0.00-1.98)           | 0          |
| <b>Bison (domestic)</b> | <b>Elk</b>       | 0.28 (0.00-2.61)       | 0.00 (0.00-0.24)           | 0          |
|                         | <b>Bison (w)</b> | 0.28 (0.00-2.57)       | 0.00 (0.00-0.16)           | 0          |
|                         | <b>Cattle</b>    | 0.24 (0.00-2.73)       | 0.00 (0.00-0.12)           | 0          |
| <b>Cattle</b>           | <b>Elk</b>       | 0.38 (0.00-2.43)       | 0.00 (0.00-2.43)           | 0          |
|                         | <b>Bison (w)</b> | 0.32 (0.00-2.34)       | 0.00 (0.00-0.24)           | 0          |
|                         | <b>Bison (d)</b> | 0.21 (0.00-2.71)       | 0.00 (0.00-0.04)           | 0          |

\*Rate represents the mean number of host transitions per year. 95% HPD, 95% highest probability density interval

†Median estimate of the total number of Markov jumps over the phylogeny

‡Bayes Factor (BF) support values
